# Supplementary material
Source: Royal Society of Chemistry journal article supplement (doi:10.1039/d6rp00243a)
Supplement: d6rp00243a1.pdf [file d6rp00243a1.pdf]

**Table S1.** Themes and codes identified through analysis of transcripts

| Domain frameworks                       | Theme                                    | Code <sup>1</sup>                       |
|-----------------------------------------|------------------------------------------|-----------------------------------------|
| Forms of nonverbal communication        | Body-based visual modes                  | Gesture                                 |
|                                         |                                          | Facial expression                       |
|                                         |                                          | Eye contact                             |
|                                         |                                          | Body movement                           |
|                                         |                                          | Body language                           |
|                                         | Non-body-based visual modes              | Attire                                  |
|                                         |                                          | Models and props                        |
|                                         |                                          | Images and photos                       |
|                                         |                                          | PowerPoint                              |
|                                         |                                          | Board work                              |
|                                         | Auditory modes                           | Silence                                 |
|                                         |                                          | Sound                                   |
|                                         |                                          | Tone of voice                           |
| Factors shaping nonverbal communication | Curriculum-related factors               | Disciplines                             |
|                                         |                                          | Educational stages                      |
|                                         | Infrastructure-related factors           | Lecture                                 |
|                                         |                                          | Laboratory                              |
|                                         | Sociocultural factors                    | Personal culture                        |
|                                         |                                          | Academic culture                        |
|                                         | Demographic factors                      | Age                                     |
|                                         |                                          | Gender                                  |
|                                         |                                          | Race                                    |
|                                         | Individual factors                       | Awareness                               |
|                                         |                                          | Emotion                                 |
|                                         |                                          | Closeness                               |
|                                         |                                          | Personalities                           |
|                                         |                                          | Personal habits                         |
|                                         |                                          | Recipients' interpretation              |
|                                         |                                          | Social anxiety                          |
| Experiences of nonverbal communication  | Positive experience                      | Sense of being encouraged               |
|                                         |                                          | Sense of being acknowledged             |
|                                         |                                          | Enhancement of engagement               |
|                                         |                                          | Safe participation                      |
|                                         |                                          | Perceived teacher enthusiasm            |
|                                         | Negative experience                      | Perceived disapproval                   |
|                                         |                                          | Increased anxiety                       |
|                                         |                                          | Perceived teacher impatience            |
|                                         |                                          | Misinterpretation                       |
|                                         |                                          |                                         |
| Application of nonverbal communication  | Application by students                  | Seeking teacher approval                |
|                                         |                                          | Signalling confusion                    |
|                                         |                                          | Showing engagement                      |
|                                         |                                          | Withdrawing from participation          |
|                                         |                                          | Showing silent acknowledgement          |
|                                         | Application by teachers                  | Enhancing students' understanding       |
|                                         |                                          | Giving approval                         |
|                                         |                                          | Signalling disapproval                  |
|                                         |                                          | Maintaining classroom control           |
|                                         |                                          | Inviting participation                  |
|                                         | Situations affecting application         | Signalling urgency or transition        |
|                                         |                                          | Class size pressure                     |
|                                         |                                          | Time constraints                        |
|                                         |                                          | Anxiety levels                          |
|                                         |                                          | Cultural expectations                   |
| Cognizance of nonverbal communication   | Understanding of nonverbal communication | Teacher–student rapport                 |
|                                         |                                          | Perceived meaning                       |
|                                         |                                          | Perceived nature                        |
|                                         | Improvement of nonverbal communication   | Lack of awareness                       |
|                                         |                                          | Teacher training                        |
|                                         |                                          | Rapport building                        |
|                                         |                                          | Cultural awareness                      |
|                                         |                                          | Controlled class size                   |
|                                         |                                          | Layout improvement                      |
|                                         |                                          | Frequent use of nonverbal communication |
| Enhanced variety of nonverbal cues      |                                          |                                         |

<sup>1</sup> Codes represent topics discussed by participants and do not indicate consensus or frequency unless explicitly stated.
